# Supplementary material for: Incorporation of imidazole within the metal–organic framework UiO-67 for enhanced anhydrous proton conductivity
Source: Royal Society of Chemistry journal article supplement (doi:10.1039/c5dt01667c), 2015-01-01
Supplement: c5dt01667c1.pdf [file c5dt01667c1.pdf]

## Supplementary Information

### **Incorporation of imidazole within the metal-organic framework**

#### **UiO-67 for enhanced anhydrous proton conductivity**

Shucheng Liu, Zifeng Yue, and Yi Liu\*

### **Experimental**

#### **Synthesis of UiO-67**

Synthesis of UiO-67 was performed by dissolving 1.2 mmol of zirconium (IV) chloride ( $ZrCl_4$ ), 1.2 mmol of 4,4'-Biphenyl dicarboxylic acid ( $H_2BPDC$ ) and 30 equivalents of acetic acid ( $CH_3COOH$ ) in 30 ml of N,N-dimethylformamide (DMF) at room temperature. The resulting mixture was placed in a 100 ml Teflon-lined stainless steel autoclave and heated at 120°C for 48 hours. The product was cooled to room temperature, washed three times with DMF, and dried at room temperature. Excess  $H_2BPDC$  and DMF in the pores were removed using a high temperature treatment at 300°C for one day. A pale yellow powder was obtained.

#### **Synthesis of imidazole@UiO-67**

The as-made UiO-67 crystal was placed in a tube furnace and evacuated at 120°C for 3 hours, then cooled to room temperature. UiO-67 and imidazole powders were placed in a container and separated by a stainless steel sieve (mesh 2000). The weight ratio of imidazole and UiO-67 is 1:1, 1:2 and 1:4. Imidazole was vapourized into UiO-67 at 120°C for 13 hours under reduced pressure.

#### **Leaching test**

The leaching test was performed as follows: the imidazole@UiO-67 powders were placed into a beaker of water. Samples were allowed to sit statically at room temperature for 1 hour. The powders were filtered and dried at room temperature for

analysis. The resulting powders were analyzed using PXRD and AC impedance spectroscopy.

### **Physical Measurements.**

Thermogravimetric analysis (TGA) were performed using a Simultaneous Thermal Analyzer (STA 449C, NETZSCH) in the temperature range between 30°C and 800°C in a N<sub>2</sub> atmosphere. X-ray powder diffraction (XRPD) data were collected on a PANalytical X'PertPowder diffractometer with CuK $\alpha$  radiation. The adsorption isotherms for N<sub>2</sub> at 77 K were measured with 3H-2000PS1 (BeiShiDe Instrument). Transmission electron microscope (TEM) measurement was performed by use of a FEI Tecnai G2 F20. X-ray photoelectron spectroscopy (XPS) was measured with Thermo Escalab 250Xi.

AC impedance spectroscopy was carried out with a ZL5 LCR instrument operated in the frequency range from 10 to 10<sup>5</sup> Hz. For conductivity measurements, the powder was compacted using uniaxial pressing into pellets under a pressure of 900 MPa. AC impedance measurements were carried out using a two-probe method with Ag-paste and Ag-wires. The measurement cell was placed in a tube furnace. The furnace was filled with under dry N<sub>2</sub> before measurement to remove moisture. Measurements were taken under anhydrous conditions and done at thermal equilibrium by holding for 10 min in the temperature range from room temperature to 200 °C. Proton conductivity was calculated using the following equation

$$\sigma = \frac{L}{SR}$$

where L and S are the length (cm) and cross-sectional area (cm<sup>2</sup>) of the samples, respectively, and R, which was extracted directly from the impedance plots, is the bulk resistance of the sample ( $\Omega$ ).

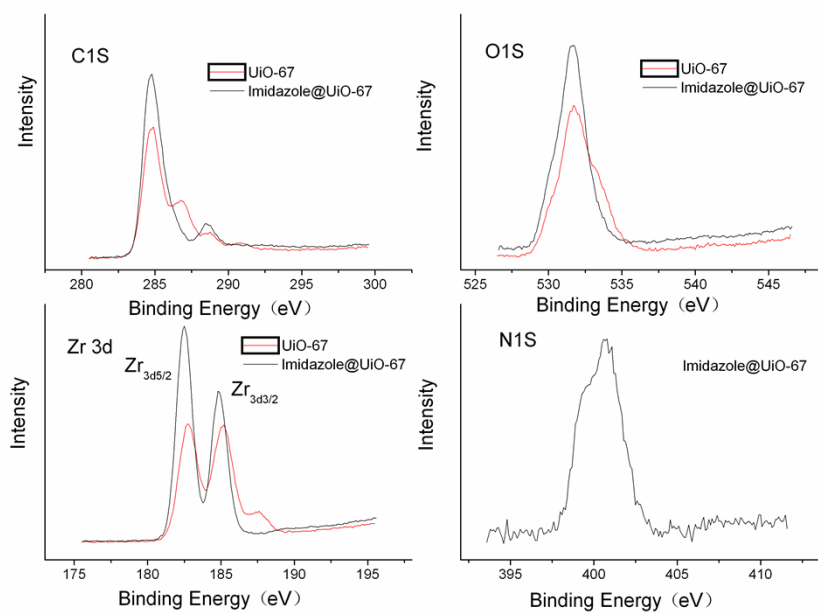

Fig. S1 XPS of UiO-67 and imidazole@UiO-67

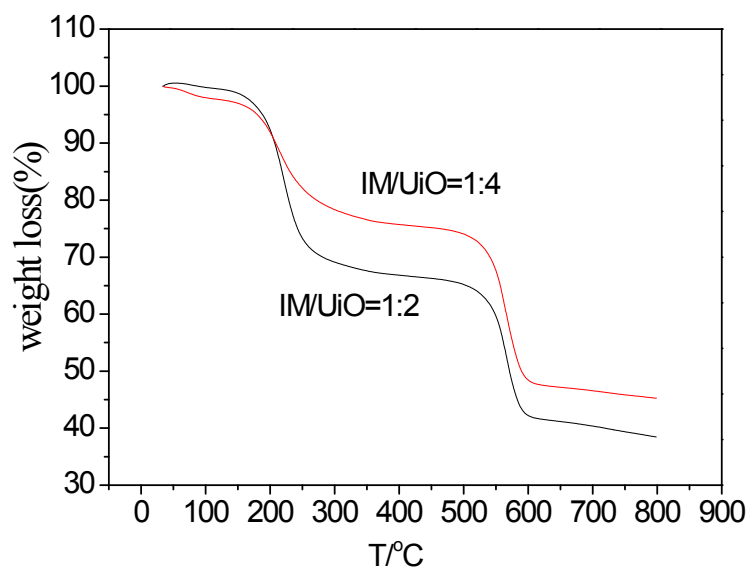

Fig. S2 TGA of imidazole@UiO-67 with different imidazole loading amount (IM/UiO=1:4 indicates the 21 % imidazole content; IM/UiO=1:2 indicates the 30 % imidazole content)

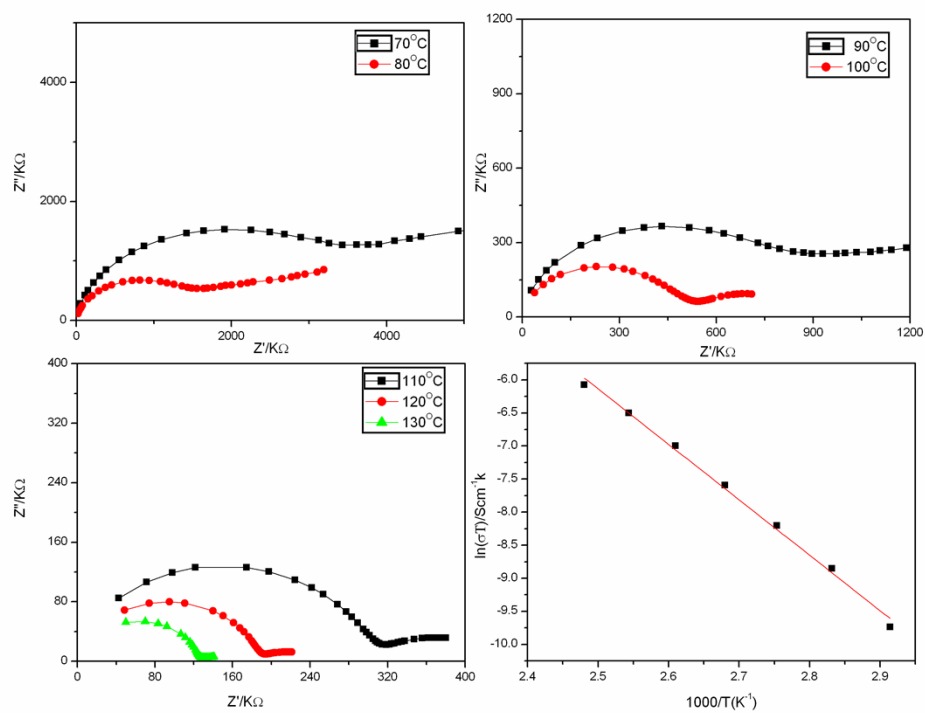

Fig. S3 AC impedance spectra (a-c) and Arrhenius curves (d) of imidazole@UiO-67 with 21 % imidazole content

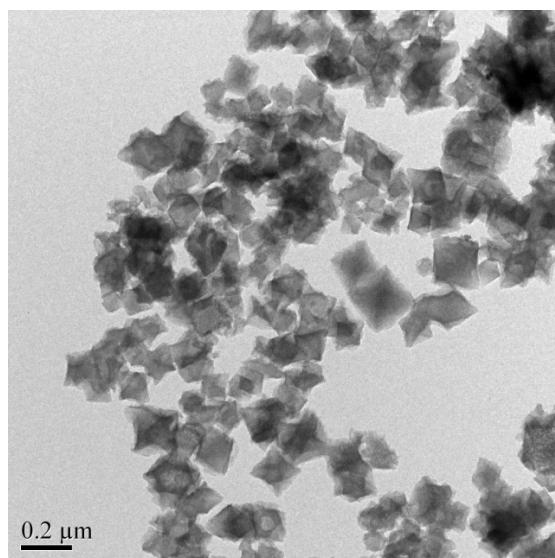

Fig. S4 TEM of UiO-67

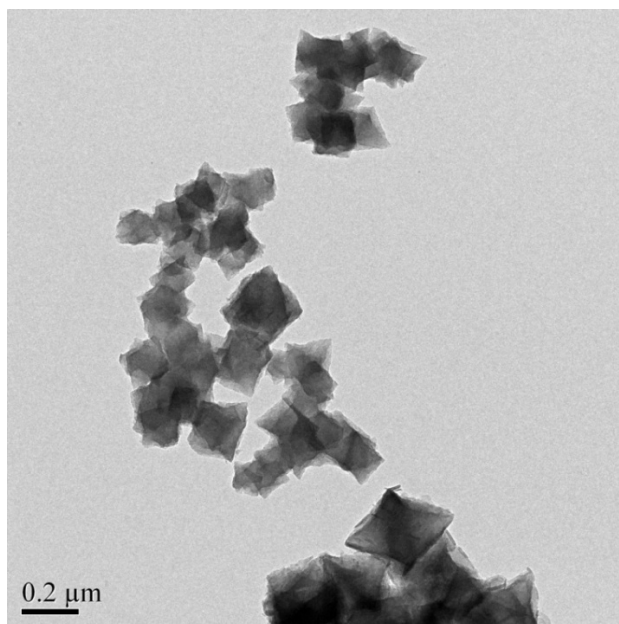

Fig. S5 TEM of imidazole@UiO-67

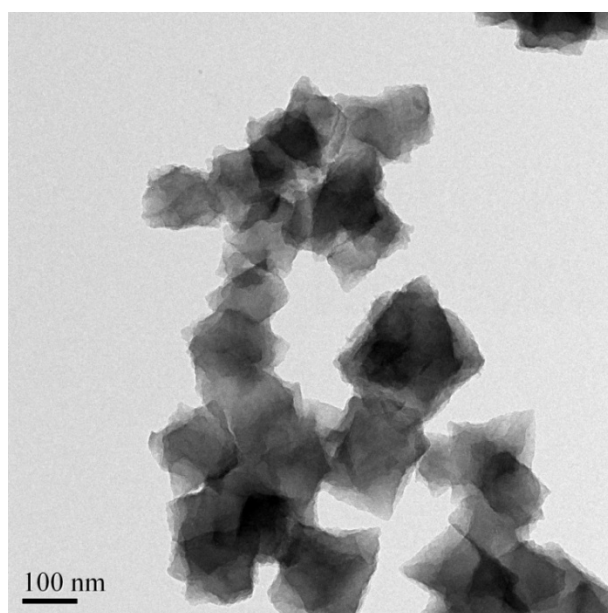

Fig. S6 TEM of imidazole@UiO-67

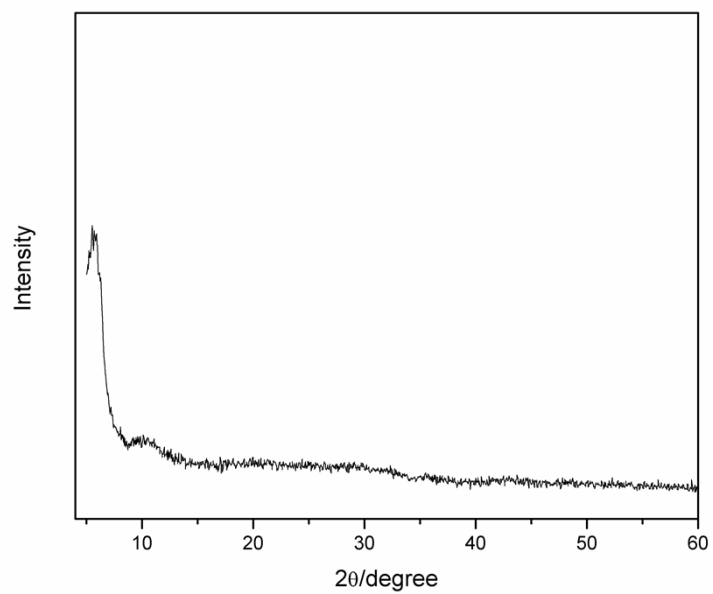

Fig. S7 XRD of imidazole@UiO-67 after treated with water for 1 hour
